# Supplementary material for: Seasonal source variability of carbonaceous aerosols at the Rwanda climate Observatory
Source: Copernicus journal article supplement (doi:10.5194/acp-2019-1027), 2019-11-19
Supplement: Supplementary file 1 [file acp-2019-1027-supplement.pdf]

# Supplementary Information

## Seasonal source variability of carbonaceous aerosols at the Rwanda climate Observatory

August Andersson<sup>1</sup>, Elena N Kirillova<sup>1,2</sup>, Stefano Decesari<sup>2</sup>, Langley DeWitt<sup>3</sup>, Jimmy Gasore<sup>3,4,5</sup>, Katherine E Potter<sup>3</sup>, Ronald G Prinn<sup>3</sup>, Maheswar Rupakheti<sup>6</sup>, Jean de Dieu Ndikubwimana<sup>4</sup>, Julius Nkusi<sup>4</sup>, Bonfils Safari<sup>5</sup>.

<sup>1</sup> Department of Environmental Science and Analytical Chemistry (ACES) and the Bolin Centre for Climate Research, Stockholm University, SE-10691 Stockholm, Sweden

<sup>2</sup> Institute of Atmospheric Sciences and Climate-ISAC, National Research Council of Italy, Bologna, Italy

<sup>3</sup> Center for Global Change Science, Massachusetts Institute of Technology, Cambridge, MA, USA

<sup>4</sup> Climate Secretariat, Ministry of Education, Kigali, Rwanda

<sup>5</sup> Physics Department, School of Science, College of Science and Technology, University of Rwanda, Kigali, Rwanda

<sup>6</sup> Institute for Advanced Sustainability Studies (IASS), Potsdam, Germany

**Correspondence:** August Andersson (august.andersson@aces.su.se)

21 **Table S1.** Concentrations ( $\mu\text{g m}^{-3}$ ;  $\mu\text{gC m}^{-3}$  for carbonaceous components) and carbon isotope  
 22 signatures (‰) of TC in PM<sub>2.5</sub> at RCO during October 2014 to September 2015. Sampling  
 23 occurred between 01.00 AM and 06.00 AM C.A.T.

| Start      | Stop       | TC    | OC    | EC   | WSOC | NO <sub>3</sub> <sup>-</sup> | SO <sub>4</sub> <sup>2-</sup> | NH <sub>4</sub> <sup>+</sup> | K <sup>+</sup> | $\Delta^{14}\text{C}_{\text{TC}}$ | $\delta^{13}\text{C}_{\text{TC}}$ |
|------------|------------|-------|-------|------|------|------------------------------|-------------------------------|------------------------------|----------------|-----------------------------------|-----------------------------------|
| 2014-10-01 | 2014-10-07 | 2.76  | 2.46  | 0.30 | 1.90 | 0.15                         | 0.98                          | 0.37                         | 0.17           | -19                               | -23.6                             |
| 2014-10-08 | 2014-10-14 | 2.80  | 2.50  | 0.30 | 1.55 | 0.12                         | 0.68                          | 0.23                         | 0.15           | N/A                               | N/A                               |
| 2014-10-22 | 2014-10-29 | 1.58  | 1.41  | 0.16 | 0.93 | 0.01                         | 0.58                          | 0.19                         | 0.08           | -44                               | -24.0                             |
| 2014-11-05 | 2014-11-18 | 1.03  | 0.93  | 0.10 | 0.56 | 0.01                         | 0.51                          | 0.15                         | 0.03           | -84*                              | -26.1*                            |
| 2014-11-19 | 2014-11-25 | 1.43  | 1.28  | 0.15 | 1.32 | 0.01                         | 0.57                          | 0.19                         | 0.04           | -84*                              | -26.1*                            |
| 2015-04-25 | 2015-05-01 | 2.61  | 2.42  | 0.19 | 1.42 | 0.07                         | 0.80                          | 0.24                         | 0.06           | -24                               | -27.3                             |
| 2015-05-02 | 2015-05-08 | 1.51  | 1.41  | 0.11 | 0.98 | 0.05                         | 0.29                          | 0.13                         | 0.03           | N/A                               | N/A                               |
| 2015-05-09 | 2015-05-15 | 1.89  | 1.77  | 0.12 | 1.20 | 0.09                         | 0.27                          | 0.14                         | 0.04           | -3                                | -25.8                             |
| 2015-05-16 | 2015-05-22 | 3.45  | 3.23  | 0.22 | 2.25 | 0.27                         | 1.02                          | 0.37                         | 0.08           | N/A                               | N/A                               |
| 2015-05-23 | 2015-05-29 | 4.99  | 4.63  | 0.36 | 2.79 | 0.32                         | 1.22                          | 0.49                         | 0.15           | +9                                | -23                               |
| 2015-05-30 | 2015-06-05 | 4.31  | 3.99  | 0.32 | 2.53 | 0.19                         | 2.08                          | 0.60                         | 0.22           | N/A                               | N/A                               |
| 2015-06-06 | 2015-06-12 | 4.63  | 4.16  | 0.47 | 3.17 | 0.67                         | 0.80                          | 0.41                         | 0.27           | +18                               | -21.7                             |
| 2015-06-13 | 2015-06-19 | 9.89  | 9.06  | 0.83 | 6.76 | 0.61                         | 4.99                          | 1.33                         | 0.78           | N/A                               | N/A                               |
| 2015-06-20 | 2015-06-26 | 10.05 | 8.67  | 1.38 | 6.15 | 1.30                         | 2.63                          | 1.02                         | 0.72           | N/A                               | N/A                               |
| 2015-06-27 | 2015-07-03 | 11.01 | 9.24  | 1.77 | 7.02 | 1.76                         | 2.22                          | 1.03                         | 0.81           | N/A                               | N/A                               |
| 2015-07-04 | 2015-07-10 | 9.27  | 7.93  | 1.34 | 5.22 | 1.27                         | 1.55                          | 0.68                         | 0.65           | +25                               | -21.3                             |
| 2015-07-11 | 2015-07-17 | 11.21 | 9.29  | 1.92 | 6.84 | 1.64                         | 1.53                          | 0.66                         | 0.83           | N/A                               | N/A                               |
| 2015-07-18 | 2015-07-24 | 13.73 | 11.77 | 1.97 | 8.45 | 2.12                         | 2.33                          | 1.02                         | 1.02           | +30                               | -22.4                             |
| 2015-07-25 | 2015-07-31 | 17.00 | 14.84 | 2.16 | 9.44 | 2.48                         | 2.43                          | 1.11                         | 1.18           | N/A                               | N/A                               |
| 2015-08-01 | 2015-08-07 | 12.00 | 10.24 | 1.77 | 6.97 | 1.81                         | 2.42                          | 0.80                         | 1.01           | +26                               | -22.4                             |
| 2015-08-08 | 2015-08-10 | 8.50  | 6.82  | 1.68 | 4.80 | 1.59                         | 1.14                          | 0.59                         | 0.26           | N/A                               | N/A                               |
| 2015-08-11 | 2015-08-17 | 7.63  | 6.37  | 1.26 | 4.87 | 0.91                         | 1.47                          | 0.60                         | 0.59           | +19                               | -22.8                             |
| 2015-08-19 | 2015-08-24 | 12.63 | 11.52 | 1.48 | 7.11 | 1.46                         | 1.48                          | 0.64                         | 0.68           | N/A                               | N/A                               |
| 2015-09-01 | 2015-09-07 | 3.59  | 3.24  | 0.35 | 2.25 | 0.17                         | 1.79                          | 0.52                         | 0.31           | -25                               | -23.3                             |
| 2015-09-08 | 2015-09-14 | 7.43  | 6.44  | 0.99 | 4.25 | 0.53                         | 1.83                          | 0.48                         | 0.48           | N/A                               | N/A                               |

24 \* two filters were combined for isotope analysis.

25

26 **Table S2.** Dual carbon isotope constrained fractions ( $f$ , in %) and concentrations of TC ( $\mu\text{gC}$   
 27  $\text{m}^{-3}$ ) from the three main sources:  $\text{C}_3$ -plants,  $\text{C}_4$  and fossil at RCO during October 2014 to  
 28 September 2015.

| Start      | Stop       | $f_{\text{C}_3}$ | $f_{\text{fossil}}$ | $f_{\text{C}_4}$ | $\text{TC}_{\text{C}_3}$ | $\text{TC}_{\text{fossil}}$ | $\text{TC}_{\text{C}_4}$ |
|------------|------------|------------------|---------------------|------------------|--------------------------|-----------------------------|--------------------------|
| 2014-10-01 | 2014-10-07 | 48±6             | 12±3                | 40±6             | 1.32±0.17                | 0.33±0.08                   | 1.10±0.17                |
| 2014-10-22 | 2014-10-29 | 48±6             | 14±3                | 38±6             | 0.76±0.09                | 0.22±0.05                   | 0.60±0.09                |
| 2014-11-05 | 2014-11-25 | 50±6             | 18±3                | 32±6             | 0.62±0.07                | 0.22±0.04                   | 0.39±0.07                |
| 2015-04-25 | 2015-05-01 | 57±6             | 12±3                | 31±6             | 1.49±0.16                | 0.31±0.08                   | 0.81±0.16                |
| 2015-05-09 | 2015-05-15 | 54±6             | 11±3                | 36±6             | 1.02±0.11                | 0.21±0.06                   | 0.68±0.11                |
| 2015-05-23 | 2015-05-29 | 49±6             | 9±3                 | 42±6             | 2.44±0.30                | 0.45±0.15                   | 2.10±0.30                |
| 2015-06-06 | 2015-06-12 | 47±6             | 9±3                 | 45±6             | 2.18±0.28                | 0.42±0.14                   | 2.08±0.28                |
| 2015-07-04 | 2015-07-10 | 46±6             | 8±3                 | 46±6             | 4.26±0.55                | 0.74±0.28                   | 4.26±0.56                |
| 2015-07-18 | 2015-07-24 | 49±6             | 8±3                 | 44±6             | 6.72±0.82                | 1.1±0.41                    | 6.04±0.82                |
| 2015-08-01 | 2015-08-07 | 49±6             | 8±3                 | 44±6             | 5.88±0.72                | 0.96±0.36                   | 5.28±0.72                |
| 2015-08-11 | 2015-08-17 | 49±6             | 9±3                 | 43±6             | 3.74±0.46                | 0.69±0.23                   | 3.28±0.46                |
| 2015-09-01 | 2015-09-07 | 47±6             | 13±3                | 40±6             | 1.69±0.22                | 0.47±0.11                   | 1.44±0.22                |

29
