# Supplementary material for: Seasonal source variability of carbonaceous aerosols at the Rwanda climate Observatory
Source: Copernicus journal article supplement (doi:10.5194/acp-2019-1027), 2019-11-19
Supplement: Supplementary file [file acp-2019-1027-RC1-supplement.pdf]

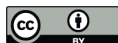

1 **Seasonal source variability of carbonaceous aerosols at the Rwanda**  
2 **climate Observatory**

3

4 August Andersson<sup>1</sup>, Elena N Kirillova<sup>1,2</sup>, Stefano Decesari<sup>2</sup>, Langley DeWitt<sup>3</sup>, Jimmy Gasore<sup>3,4,5</sup>,  
5 Katherine E Potter<sup>3</sup>, Ronald G Prinn<sup>3</sup>, Maheswar Rupakheti<sup>6</sup>, Jean de Dieu Ndikubwimana<sup>4</sup>, Julius  
6 Nkusi<sup>4</sup>, Bonfils Safari<sup>5</sup>.

7 <sup>1</sup> Department of Environmental Science and Analytical Chemistry (ACES) and the Bolin Centre  
8 for Climate Research, Stockholm University, SE-10691 Stockholm, Sweden

9 <sup>2</sup> Institute of Atmospheric Sciences and Climate-ISAC, National Research Council of Italy,  
10 Bologna, Italy

11 <sup>3</sup> Center for Global Change Science, Massachusetts Institute of Technology, Cambridge, MA,  
12 USA

13 <sup>4</sup> Climate Secretariat, Ministry of Education, Kigali, Rwanda

14 <sup>5</sup> Physics Department, School of Physics, College of Science and Technology, University of  
15 Rwanda, Kigali, Rwanda

16 <sup>6</sup> Institute for Advanced Sustainability Studies (IASS), Potsdam, Germany

17

18 **Correspondence:** August Andersson (august.andersson@aces.su.se)



19 **Abstract**

20 Sub-Saharan Africa (SSA) is a global hotspot for aerosol emissions, affecting regional  
21 environmental sustainability. In this paper we use atmospheric observations to address one of the  
22 major uncertainties of the e.g., climate and health impact of SSA aerosols: the quantitative  
23 contributions from different emissions sources. Ambient fine fraction aerosol (PM<sub>2.5</sub>) were  
24 collected on filters at the high altitude (2590 m.a.s.l.) Rwanda Climate Observatory (RCO), an  
25 SSA background site, during dry and wet seasons in 2014 and 2015. The concentrations of both  
26 carbonaceous aerosols and inorganic ions show a strong seasonal cycle, with highly elevated  
27 concentrations during the dry season. Source marker ratios, including carbon isotopes, show that  
28 the wet and dry seasons have distinct aerosol compositions. The dry season is characterized by  
29 elevated amounts of biomass burning products, approaching ~95% for carbonaceous aerosols. An  
30 isotopic mass-balance estimate shows that the amount of the carbonaceous aerosols stemming  
31 from savanna fires may increase from ~0.6 µg/m<sup>3</sup> in the wet season up to ~10µg/m<sup>3</sup> during the  
32 dry season. Taken together, we here quantitatively show that savanna fire is the key modulator of  
33 the seasonal aerosol composition variability at the RCO, an SSA background site.



## 34 1. Introduction

35 Sub-Saharan Africa (SSA) currently face major challenges for sustainable development, including  
36 industrial development, agriculture, fresh water supply, climate change, energy resources and air  
37 pollution (IPCC 2014; UNDP, 2018). Either directly, or indirectly, these challenges have linkage  
38 to aerosol emissions. Aerosols offset the ongoing regional climate warming in SSA, shift monsoon  
39 and precipitation pattern, are linked to both manmade (e.g., industry, traffic and agriculture) and  
40 ecosystem emissions, and are detrimental for air quality (IPCC 2013; WHO 2016). Ambient air  
41 pollution in SSA is estimated to cause 563.000 premature deaths annually, making it one of the  
42 main causes for mortality in the region (Bauer et al., 2019). However, the level of scientific  
43 understanding of the sources, properties and impacts of aerosols is not in parity with the multi-  
44 faceted societal impact. Central to this offset is the complex aerosol lifecycle, where emissions,  
45 transformations and sinks all are associated with large uncertainties, in particular given the vast  
46 physical and chemical complexity of these colloids. A major limiting factor in improving our  
47 understanding of these effects in the SSA are the limited number of in situ observations (Williams,  
48 2007; Cais et al., 2011; Kulmala, 2018; López-Ballesteros et al., 2018).

49 A major source of aerosol emissions in SSA are dry season regional fires – clearly visible from  
50 space (Fig. 1). These may either be formed naturally, e.g., lightning strikes, but are mainly lit by  
51 humans (Bird and Cali, 1998; Archibald et al., 2012). There is evidence that slash-and-burn  
52 agriculture in SSA has been a common practice for thousands of years. This long-term  
53 anthropogenic perturbation is a significant modulator of the current ecosystem structure. A number  
54 of previous studies have been specifically focused on characterizing emissions of aerosols and  
55 gases from African fires, e.g., the Southern African Regional Science Initiative Project (SAFARI  
56 2000), conducted between 1999 to 2001 (Swap et al., 2003). Ground- and airborne chemical  
57 characterization from this and other campaigns suggest a rather distinct chemical composition  
58 (Table 1).

59 Carbonaceous aerosols, often quantified as total carbon (TC), are generally divided into two main  
60 components: black carbon (BC; here we use elemental carbon (EC) to quantify the amounts of  
61 BC) and organic carbon (OC). Although overlapping to some extent, these two pools generally  
62 have quite different atmospheric lifecycles and environmental effects. Formed from incomplete  
63 combustion, sunlight-absorbing BC contributes to regional warming and is a particularly health



64 detrimental component in air pollution (WHO 2012; WMO/UNEP 2011; IPCC 2013; Bond et al.,  
65 2013). BC is chemically inert to atmospheric reactions, and thus the lifetime is mainly determined  
66 by deposition. OC is also emitted from incomplete combustion (with different emission factors)  
67 but is also emitted from non-combustion sources and ~~is also~~ formed in the air through secondary  
68 processes. OC is thought to have an overall cooling effect on the climate. Being more chemically  
69 reactive, the OC pool to some extent has a more complex atmospheric lifetime, with continuous  
70 heterogenous chemistry, rendering the lifetime dependent on both precipitation and chemical  
71 transformations. Emissions from SSA fires are expected to contribute to a large part of the total  
72 TC atmospheric burden.

73 In general, the actual environmental impact of TC on SSA is ~~still~~ poorly constrained. Bottom-up  
74 emissions projections suggests that the TC emissions from SSA are expected to increase rapidly  
75 during the coming decades, perhaps reaching 50% of the global OC burden by 2030 (Lioussé et  
76 al., 2014). To quantify and evaluate such model predictions, as well as to characterize the overall  
77 aerosol composition, it is valuable to conduct measurements at regional background sites. Dual  
78 carbon isotope characterization ( $\Delta^{14}\text{C}$  and  $\delta^{13}\text{C}$ ) of TC at background sites in South and East Asia  
79 and the Arctic has been shown to be a valuable tool for quantitatively constraining the emissions  
80 from different sources (Gustafsson et al., 2009; Andersson et al., 2015; Sheesley et al., 2012;  
81 Kirillova et al., 2014; Winiger et al., 2019).

82 In this paper we present dual carbon isotope constraints of TC, along with chemical  
83 characterization of inorganic ions and different carbonaceous pools, from a study conducted at the  
84 Rwanda Climate Observatory (RCO), during October 2014 to September 2015. A key objective  
85 of the study was to estimate the relative contributions from major TC source categories at this  
86 regionally representative site in the SSA. In particular, we investigate the source variability  
87 associated with the seasonal variations between prevailing wet and dry monsoon periods in the  
88 region and the contributions from savanna fires.

89

## 90 2. Methods and Materials

### 91 2.1 Filter sampling



92 The sampling site, the Rwanda Climate Observatory (RCO), is located on the top of Mt. Mugogo,  
93 in ~~the western~~ mountainous Rwanda. (1.586° S, 29.566° E, 2590 m above sea level, 5 m above  
94 ground). The station was established as a collaboration between the Massachusetts Institute of  
95 Technology (MIT, USA) and the Rwandan Government in 2013. The station is described in more  
96 detail by DeWitt et al. (2019). The station is an Advanced Global Atmospheric Gases Experiment  
97 (AGAGE) network site (for full list of instruments see <http://agage.mit.edu>).

98 Quartz filter samples (Millpores, 150 mm diam) were collected with a high-volume sampler (DH-  
99 77, Digitel Inc. Switzerland) operating at 30m<sup>3</sup> h<sup>-1</sup> using a PM<sub>2.5</sub> inlet. Night-time only (1AM to  
100 6AM) sampling was conducted to minimize the effects of local emissions and day-time local  
101 atmospheric chemistry and to increase likelihood to capture the regional, free troposphere, signals.  
102 This strategy is supported by high temporal investigations of the diurnal cycle of, e.g., BC (DeWitt  
103 et al., 2019). The filter-samples were pre-combusted together with aluminum foil envelopes  
104 (400°C for 5h), and were treated with special attention to minimize contamination. The filter  
105 samples were subsequently shipped to Stockholm University for chemical/isotopic analysis. The  
106 samples were stored in freezers both on site and at Stockholm University. Field blanks were  
107 collected on a monthly basis. The present campaign covers the period October 2014 to September  
108 2015. However, the period December 2014 to April 2015 is missing due to a lightning strike which  
109 damaged the instrument. Thus, this study presents results from analysis of filter samples (in total  
110 25) collected for the periods that cover the beginning of the 2014 fall rainy season (Oct-Nov), the  
111 end of the spring 2015 rainy season (April – May) and the dry 2015 summer season (June –  
112 September). We jointly refer the October-November 2014 and the April-May 2015 periods as the  
113 wet periods.

## 114 2.2 Concentrations analysis

115 The concentrations of elemental carbon (EC – mass-based tracer for black carbon) and organic  
116 carbon (OC) were determined using a Sunset Inc. thermal-optical instrument using the NIOSH  
117 4050 protocol (Birch and Cary, 1996; Table S1). Pre-treatment using acid fumigation with **1M**  
118 HCl ensured efficient removal of carbonates. A glucose solution was used to calibrate the FID-  
119 response of the instrument, and the long-term performance of the instrument was checked through  
120 running of National Institute of Standards and Technology (NIST) Standard Reference Materials  
121 (SRM) standards. All the concentrations were blank corrected and the field blank input was on



122 average 2% for OC and 0% for EC. The average relative standard deviation of the triplicate  
123 analysis was 5% for OC, 7% for EC.

124 Water-soluble organic carbon (WSOC) was extracted from filter sub-samples in ultra-pure Milli-  
125 Q water through 1.5 hour shaking. The extracts were filtered using 0.45  $\mu\text{m}$  cutoff PTFE syringe  
126 filters (Minisart-SRP 10, Sartorius Stedim biotech, Germany). The concentration of WSOC was  
127 quantified in the filtered solutions as a difference between total water-soluble carbon and water-  
128 soluble inorganic carbon using a high temperature catalytic oxidation instrument TOC-5000A  
129 (Shimadzu, Japan). The samples were neither acidified nor purged, to avoid the loss of volatile  
130 organic compounds. The accuracy of the measurement ranges from 7% for 1  $\text{mg}\cdot\text{L}^{-1}$  of carbon  
131 solution to 3% for concentrations higher than 2  $\text{mg}\cdot\text{L}^{-1}$  of carbon. All the measurements were blank  
132 corrected. WSOC field blanks corresponded to an average 0.5%. The average relative standard  
133 deviation of the triplicate analysis was 10%.

134 The concentrations of water-soluble inorganic anions were determined by ion chromatography  
135 using a Dionex ICS-2000 system. Anions were separated using an IonPac AG11 2x50 mm Dionex  
136 guard column, IonPac AS11 2x250 mm Dionex separation column and ASRS 300 self-  
137 regenerating suppressor. A solution of KOH was used as eluent. Cations were separated using an  
138 IonPac CG16 3x50 mm Dionex guard column, IonPac CS11 3x250 mm Dionex separation column  
139 and CSRS 300 self-regenerating suppressor. The analysis of cations was performed using 30 mM  
140 solution of MSA as eluent. Field blanks constituted on average 3% of  $\text{NO}_3^-$ , 2% of  $\text{SO}_4^{2-}$  and 1%  
141 of  $\text{NH}_4^+$  and  $\text{K}^+$  ion concentrations. The triplicate analysis showed the average relative standard  
142 deviation of 2% for  $\text{NO}_3^-$  and  $\text{K}^+$ , 5% for  $\text{SO}_4^{2-}$  and 6% for  $\text{NH}_4^+$ .

143

### 144 2.3 Isotope analysis

145 Approximately every second sample ( $n = 12$ ) were selected for carbon isotope ( $\Delta^{14}\text{C}$  and  $\delta^{13}\text{C}$ )  
146 analysis of total carbon ( $\text{TC} = \text{OC} + \text{EC}$ ; Table S1). The filter samples were combusted using the  
147 Sunset analyzer (total carbon protocol) and the evolved  $\text{CO}_2$  was collected in glass vials using a  
148 liquid nitrogen cryo-trap (e.g., Andersson et al., 2015). The vials were subsequently shipped to the  
149 National Ocean Sciences Accelerator Mass Spectrometry (NOSAMS) facility at the Woods Hole  
150 Oceanographic Institute for analysis of the dual carbon isotope signatures. The  $\Delta^{14}\text{C}$ -signature was



151 measured using accelerator mass spectrometry (AMS), while the  $\delta^{13}\text{C}$ -signature was measured  
152 using an Isotope Ratio Mass Spectrometer (IRMS).

153

#### 154 2.4 Source Apportionment

155 The  $\Delta^{14}\text{C}$ -signature allows the differentiation between the relative contributions of  
156 biogenic/biomass burning and fossil sources. The fraction biogenic/biomass burning ( $f_{\text{bio}}$ ) may be  
157 calculated using isotopic mass-balance ( $f_{\text{fossil}} = 1 - f_{\text{bio}}$ ):

$$158 \quad \Delta^{14}C_{\text{sample}} = f_{\text{bio}} \cdot \Delta^{14}C_{\text{bio}} + (1 - f_{\text{bio}}) \cdot \Delta^{14}C_{\text{fossil}} \quad (1)$$

159 The fossil endmember is -1000‰, as it is completely depleted in  $^{14}\text{C}$ . The biomass endmember is  
160 more complex. For annual plants it is fairly straight-forward: the biomass  $\Delta^{14}\text{C}$ -signature equals  
161 the  $\Delta^{14}\text{C}$  value of  $\text{CO}_2$  for that year ( $\sim +20\text{‰}$  for 2014/15, Graven, 2015; Turnbull et al., 2017).  
162 For more long-lived species (e.g., trees) the  $\Delta^{14}\text{C}$ -signature is the average of the atmospheric  $\text{CO}_2$   
163 values (weighted by yearly carbon accumulation) over the plants' lifetime. Bottom-up estimation  
164 of  $\Delta^{14}\text{C}_{\text{bio}}$  therefore requires information regarding the plant distribution in the area of interest, and  
165 the annual bioaccumulation of carbon for the different plants. As an alternative we here use the  
166 combined  $\Delta^{14}\text{C}$ -signature of dissolved organic carbon (DOC) in three of the regions' major rivers,  
167 Congo, Zambezi and Tana, to obtain a regional  $\Delta^{14}\text{C}_{\text{bio}} +57 \pm 52 \text{‰}$ , which is well in the expected  
168 range of a mixture of annual and multi-year plants (Marwick et al., 2015; Wild et al., 2019, Winiger  
169 et al., 2019).

170 The vegetation in SSA may be divided into two main classes:  $\text{C}_3$ -plants and  $\text{C}_4$ -plants – see  
171 discussion in Section 3.5. These two groups have distinct  $\delta^{13}\text{C}$ -signatures, and may therefore be  
172 separated. We may then resolve three source classes by combining  $\Delta^{14}\text{C}$  and  $\delta^{13}\text{C}$ :  $\text{C}_3$ -plants,  $\text{C}_4$ -  
173 plants and fossil, through isotopic mass-balance (Andersson et al., 2015):

$$174 \quad \begin{pmatrix} \Delta^{14}\text{C} \\ \delta^{13}\text{C} \\ 1 \end{pmatrix} = \begin{pmatrix} \Delta^{14}\text{C}_{\text{C3}} & \Delta^{14}\text{C}_{\text{C4}} & \Delta^{14}\text{C}_{\text{fossil}} \\ \delta^{13}\text{C}_{\text{C3}} & \delta^{13}\text{C}_{\text{C4}} & \delta^{13}\text{C}_{\text{fossil}} \\ 1 & 1 & 1 \end{pmatrix} \begin{pmatrix} f_{\text{C3}} \\ f_{\text{C4}} \\ f_{\text{fossil}} \end{pmatrix} \quad (2)$$

175 Endmember variability may significantly influence the calculated source fractional contributions  
176 (Andersson, 2011). For a discussion on the specific endmember ranges used here, see Section 3.5.



177 To account for the endmember variability, we implement a Bayesian approach, numerically  
178 resolve through Markov chain Monte Carlo simulations, implemented in Matlab, ver. 2015b  
179 (Andersson et al., 2015).

180

181 2.5 Remote Sensing and Air Mass Back trajectories.

182 Hourly 7-day air mass back trajectories (arrival height 2600 m.a.s.l.) were calculated using the  
183 NOAA Hybrid Single Particle Lagrangian Integrated Trajectory Model (HYSPLIT). Remote  
184 sensing fire-spot detections were retrieved from the NASA Fire Information for Resource  
185 Management Services (FIRMS) database, based on retrievals from the Moderate Resolution  
186 Imaging Spectroradiometer (MODIS) satellite product.

187

### 188 3 Results and Discussion

#### 189 3.1 Rwanda and the monsoon

190 The meteorology of Rwanda is governed by the East African monsoon, with peak rainfalls in in  
191 April and November. There are thus two dry seasons, December-January-February (DJF) and the  
192 main dry season June-July-August (JAA). The dry periods in SSA are characterized by extensive  
193 biomass burning. During DJF the fires mainly occur to the north of Rwanda, and during JJA to the  
194 south (Fig. 1). Savannas are the main biomes in SSA, covering ~ 65% of the landmass, and are the  
195 main source of fire emissions (Cahoon et al., 1992). Located in a highly elevated region, Rwanda  
196 is, broadly speaking, surrounded by savanna regions, except to the west, where the tropical  
197 rainforests of Africa are located.

198 Air mass back trajectory analysis suggests that the air masses during the filter collection periods  
199 are overall easterly (Fig. 1). There is some overlap between the wet and JJA periods, but overall  
200 there is a seasonal switch, where the wet periods are more of northeastern origins (e.g., Kenya,  
201 Ethiopia and Somalia), whereas the dry JJA is more directly eastern/southeastern (e.g., Kenya,  
202 Tanzania). During JJA there are extensive fires to the south of RCO, mainly to the south-west.  
203 Given the easterly air mass transport, RCO is thus in general not directly downwind of these source  
204 regions. However, given the comparably low non-fire background emissions during this time, the





205 influence may still be significant;  $BT_x$  analysis is highly challenging in mountainous regions (e.g.,  
206 Winiger et al., 2019), and the actual geographical footprints would be broader when, e.g.,  
207 incorporating parametrizations for turbulence. Here we interpret the  $BT_x$  qualitatively to visualize  
208 overall air mass transport patterns.

209

### 210 3.2 Concentrations of fine aerosol components

211 During the present campaign, the  $PM_{2.5}$  carbonaceous and inorganic ion components show a strong  
212 seasonal variability, with elevated levels during the dry JJA period (Fig. 2, Table S1). The dry/wet  
213 period ratios for TC, EC, WSOC,  $NO_3^-$ ,  $SO_4^{2-}$ ,  $NH_4^+$  and  $K^+$ , were 4.2, 7.0, 4.1, 12.6, 3.0, 3.2 and  
214 8.8, respectively. This variability suggests differences in the aerosol regime, in addition to  
215 seasonality in meteorology, e.g., varying boundary layer heights or precipitation. The sea-salt  
216 contributions to the ions are overall estimated to be less than 1%, based on corrections with sodium  
217 ions (Blanchard and Woodcock, 1980). We here report the actual concentrations to ease direct  
218 comparisons with previous studies. Overall these differences reflect differences in aerosol  
219 atmospheric lifetime, differences in air mass transport pathways and seasonality in emissions (e.g.,  
220 fires), as well as other factors. Elevated ratios of EC and  $K^+$  suggests an increased influence from  
221 biomass burning during the dry season.  $NO_3^-$  - which displays the largest seasonal shift - is often  
222 associated with oxidized  $NO_x$  from traffic emissions or lightning strikes. However, it has also has  
223 also been shown to be elevated during savanna burning events (Table 1).

224 The dry season concentrations of the carbonaceous aerosols components and inorganic ions  
225 observed here are overall in good agreement with the concentrations observed dry season rural and  
226 aged savanna fire air masses (Table 1). The BC values are in the same range as has previously  
227 been observed at Mt. Kenya ( $0.72 \pm 0.06 \mu gC m^{-3}$ , Gatari et al., 2003). During atmospheric aging  
228 of a biomass plume, the values of OC, EC and  $K^+$  decrease by a factor of 2-3, whereas other  
229 components are un-affected (Table 1). However, the effects appear variable, as compared with  
230 savanna fires in South Africa (Gao et al., 2003).

231 RCO is situated not far away from the downwind Nyiargongo and Nyamuragria Volcanoes in  
232 eastern Democratic Republic of Congo. Satellite-monitoring of the  $SO_2$  emissions from these  
233 volcanos show a near-constant activity over the time period covering the present campaign,



234 potentially affecting the observed sulfate levels (Barrière et al., 2017). Here we observe an  
235 elevation in sulfate levels ( $\sim 5\mu\text{g m}^{-3}$ ) during the week starting of the 13<sup>th</sup> of June 2015 (Fig. 2),  
236 potentially indicating influence from volcanic emissions, but with no clear linkage to an increase  
237 in activity.

238

### 239 3.3 Source marker ratios and correlations

240 Overall, the ratios of different aerosol components provide insights into sources or atmospheric  
241 processes. Here, the OC/EC-ratio shows a distinct seasonality, with elevated levels during the wet  
242 season ( $11\pm 3$ ) compared to the dry season ( $7\pm 3$ ; Fig. 3; Table S1). The OC/EC-ratio is sometimes  
243 used as a marker for biomass burning, but it is highly influenced by atmospheric processes such  
244 as secondary organic aerosol (SOA) formation or photo-chemical aging (e.g., Dasari et al., 2019).  
245 The dry season values observed here are similar to what has been observed in background air at  
246 other dry season Sub-Saharan African sites (Table 1). The elevated wet-season OC/EC-ratios may  
247 indicate increased relative influence of local SOA formation.

248 Similarly, the  $\text{NH}_4^+/\text{TC}$  and  $\text{SO}_4^{2-}/\text{TC}$  are also elevated during the wet periods (Fig. 3), while  
249 decrease during the dry seasons, suggesting a different source profile compared to EC,  $\text{K}^+$  and  
250  $\text{NO}_3^-$ . In contrast, the WSOC/OC-ratio shows no clear seasonality, indicating that the sources and  
251 atmospheric processing of water-soluble and water-insoluble organic components are not changing  
252 significantly over the year. TC correlates with  $\text{K}^+$  ( $R^2 = 0.95$ ,  $p < 0.01$ ) and  $\text{NO}_3^-$  ( $R^2 = 0.95$ ,  $p < 0.01$ ),  
253 suggesting that the incomplete combustion regime during the present campaign is governed by  
254 biomass burning emissions, e.g., savanna burning. Taken together, these ratios qualitatively  
255 suggest that the aerosol regime at RCO is strongly influenced by a pulse of biomass burning  
256 products during the JJA-dry period.

257

### 258 3.4 Carbon isotopes

259 Radiocarbon ( $\Delta^{14}\text{C}$ ) and stable-carbon ( $\delta^{13}\text{C}$ ) provides detailed information regarding the sources  
260 and atmospheric processing of carbonaceous aerosols. Here, we investigated the signatures of TC  
261 for roughly every second sample during the campaign. The  $\Delta^{14}\text{C}$ -marker is not influenced by



262 atmospheric processing, and may be used to compute the relative contributions of fossil vs  
263 biomass/biogenic sources with high precision, Eq. (1). The  $\Delta^{14}\text{C}$ -signature shows an oscillation  
264 over the seasons (Fig. 4), ranging between  $-84\text{‰}$  (November, 2014) and  $+30\text{‰}$  (July, 2015; Fig.  
265 4; Table S1). Thus, during the JJA period, the  $\Delta^{14}\text{C}$ -signature occasionally exceeds the signature  
266 for atmospheric  $\text{CO}_2$  ( $+20\text{‰}$ , Graven, 2015; Turnbull, 2017).

267 Using Equation (1), the fraction biomass/biogenic TC for this sample is 97%. During the wet  
268 season, the fraction fossil reaches 13%, possibly of a more local character.  $\Delta^{14}\text{C}$  correlates with  
269  $1/\text{TC}$  ( $R^2 = 0.85$ ,  $p < 0.01$ ), suggesting a two-state source mixing regime between and background  
270 signal and a temporally varying source (Keeling, 1958, Fig. 4C). This inverse relation gives  $\Delta^{14}\text{C}$   
271  $= +37 \pm 6\text{‰}$  as  $\text{TC} \rightarrow \infty$ , showing that the non-background state is dominated by biogenic/biomass  
272 burning emissions. The  $\Delta^{14}\text{C}$ -signatures for TC reported here are overall higher than what has been  
273 reported at receptor sites in South and East Asia (Sheesley et al., 2012; Kirillova et al., 2014;  
274 Bikkina et al., 2016).

275 In contrast to  $\Delta^{14}\text{C}$ , the  $\delta^{13}\text{C}$ -ratio is influenced by both atmospheric processes and atmospheric  
276 signatures. Here, the  $\delta^{13}\text{C}$ -ratio shows a similar pattern relative to the  $\Delta^{14}\text{C}$ -ratio, depleted (min -  
277  $27\text{‰}$ ) during wet periods, and enriched during JJA (max  $\sim -21\text{‰}$ ). The  $^{13}\text{C}/^{12}\text{C}$ -ratio has overall  
278 been found to be more enriched in aged air masses in South Asia, especially for WSOC (Sheesley  
279 et al., 2012; Kirillova et al., 2013). However, less so for TC. In fact, the enrichment of  $\delta^{13}\text{C}$  in  
280 WSOC often appears to be counter-acted by the depletion in water-insoluble OC (e.g., Yan et al.,  
281 2017; Fang et al., 2017).

282 The TC  $\delta^{13}\text{C}$  values, and their seasonal trend, are similar to what has previously been observed in fine  
283 aerosols at a rural site in Tanzania (May – August, 2011, Mkoma, et al., 2014). However, the  
284 temporal trend appears shifted: for RCO from values around  $-25\text{‰}$  to  $\sim 22\text{‰}$  around mid-May.  
285 At the Tanzanian site, a similar shift occurs in mid-June. In addition to the measurements being  
286 conducted at different sites during different years, there is a good agreement, and the temporal  
287 offset may be explained by ITCZ position variability. Similarly, the  $\delta^{13}\text{C}$  for TC at savanna  
288 woodland site in Zambia, observed during August-September 2000, was  $-21.8 \pm 0.8\text{‰}$  (Billmark  
289 et al., 2003), while values between  $-19.3$  and  $-23.6\text{‰}$  were observed at sites in the Ivory Coast  
290 (Cachier et al., 1985).



291

### 292 3.5. Carbon isotope-based source apportionment

293 By combining the  $\Delta^{14}\text{C}$  and the  $\delta^{13}\text{C}$ -ratios, we can by isotopic mass balance resolve three major  
294 sources of TC at the RCO. However, there are some important considerations to this approach:  
295 (1.) The  $\delta^{13}\text{C}$ -ratio is not an exclusive source marker, but is also affected by atmospheric  
296 processing (e.g., photo-chemical oxidation and secondary formation). (2.) The main source  
297 categories must be defined and distinguishable with carbon isotopes (3.) The source values of the  
298 isotope-signatures – the endmembers – and their natural variability need to be established.

299 As mentioned, the  $\delta^{13}\text{C}$ -ratio of bulk TC appears to be considerably less affected by atmospheric  
300 processing compared to sub-components, such as WSOC. Here, the temporal variation of the  $\delta^{13}\text{C}$ -  
301 ratio is qualitatively similar to that of  $\Delta^{14}\text{C}$ -ratio (Fig. 4). Since  $\Delta^{14}\text{C}$  is not affected by atmospheric  
302 reactions, this suggests that source variability is a key driver of the  $\delta^{13}\text{C}$  variability. Furthermore,  
303 the WSOC/OC is virtually constant throughout the year; the WSOC/OC-ratio has been found to  
304 be highly affected by atmospheric processing and related to shifting  $\delta^{13}\text{C}$  (Kirillova et al., 2013;  
305 Yan et al., 2017; Fang et al., 2018; Dasari, 2019). Here, we therefore assume that the  $\delta^{13}\text{C}$ -ratio of  
306 TC is not strongly perturbed by atmospheric processing, and may thus be used as a source marker.

307 Turning to potential sources, there is a multitude of potential source categories for TC in SSA.  
308 However, many of these falls in broader categories, with similar carbon isotopic signatures.  
309 Around the world, the applications of dual carbon isotopes in ambient TC mainly  
310 identified/considered 6 broad source categories:  $\text{C}_3$  plants,  $\text{C}_4$  plants, liquid fossil (e.g., traffic),  
311 coal combustion (solid fossil), gas flaring (gaseous fossil) and marine emissions (Winiger et al.,  
312 2019; Andersson et al., 2015; Kirillova et al., 2013). Overall, the practice of coal combustion in  
313 SSA is expected to be much less frequent than in, e.g., South and East Asia, and we therefore do  
314 not consider this source further. In addition, marine emissions are not expected to have a large  
315 influence at RCO, supported by the low estimates of marine contributions to the inorganic ions  
316 (<1%). For gas flaring, there are potential distant sources around the Arabian Peninsula and off  
317 the west coast of Africa, in the Gulf of Guinea. However, given the distances to the RCO station  
318 and the prevailing wind directions, emissions from flaring are not expected to affect the site.



319 The remaining three main source categories are the two biomass sources of C<sub>3</sub> (e.g., trees) and C<sub>4</sub>  
320 plants (e.g., sugarcane and certain grasses) and liquid fossil. Aerosols from liquid fossil sources  
321 have a  $\Delta^{14}\text{C}_{\text{fossil}} = -1000\text{‰}$  (completely depleted in <sup>14</sup>C) and a  $\delta^{13}\text{C}_{\text{fossil}} = -25.5 \pm 1.3\text{‰}$  (Widory,  
322 2006; Andersson et al., 2015). The  $\Delta^{14}\text{C}$  of biomass was established in Section 2.4, ~~and we set;~~  
323  $\Delta^{14}\text{C}_{\text{C}_3} = \Delta^{14}\text{C}_{\text{C}_4} = +57 \pm 52\text{‰}$ . The  $\delta^{13}\text{C}$  of C<sub>3</sub>-plants in general is  $-27.1 \pm 2\text{‰}$  (Bender, 1971;  
324 O’Leary, 1988). However, for aerosols generated from C<sub>3</sub>-plants this value may be either enriched  
325 (e.g.,  $\sim 0.5\text{‰}$  biomass burning) or depleted (e.g.,  $\sim 0$  to  $4\text{‰}$  during SOA formation) (Turekian,  
326 1998; Das et al. 2010, Mkoma et al., 2014; Aguilera and Whigham, 2018). In any case, the  
327 numerical spread in the  $\delta^{13}\text{C}$  of these different scenarios are largely overlapping with that of the  
328 raw materials, and we therefore use this value here. The  $\delta^{13}\text{C}$  of C<sub>4</sub>-plants is  $-13.1 \pm 1.2\text{‰}$  (Bender,  
329 1971; O’Leary, 1988; Turekian 1998). During incomplete combustion, the  $\delta^{13}\text{C}_{\text{C}_4}$  may be depleted  
330 by a factor ranging between 0 to 7‰, largely dependent on burning conditions and different species  
331 (Martinelli, 2002; Das et al., 2010; Aguilera and Whigham, 2018). To account for these effects,  
332 we set  $\delta^{13}\text{C}_{\text{C}_4}$ :  $-16.6 \pm 2.2\text{‰}$ , where the standard deviation is propagated from the variability of the  
333 raw plant signature and one fourth of the maximum spread (7‰) of the depletion ( $\sigma^2 = 1.2^2 +$   
334  $(7/4)^2$ ).

335 The fractional source contributions of fossil, C<sub>3</sub> and C<sub>4</sub> to TC may then be solved using these  
336 endmembers, using Eq. (2), (Fig. 5). It is well-established that accurate estimation of the fractional  
337 source contributions requires explicit incorporation of the endmember variability, and we here use  
338 a Bayesian framework driven by Markov chain Monte Carlo simulations for this purpose  
339 (Andersson, 2011; Andersson et al., 2015). The resulting fractional contributions display a large  
340 variability when comparing wet and dry conditions (Fig. 6A; Table S2). The dry season is  
341 characterized by relatively higher C<sub>4</sub>-plant contributions, whereas the relative contributions of  
342 fossil and C<sub>3</sub>-plants are higher during the wet periods. By combining the estimated fractional  
343 source contributions with the TC concentrations, we can estimate the concentrations from the  
344 different sources (Fig. 6B), revealing a more accentuated source variability. The average dry-to-  
345 wet ratios of the TC concentrations for C<sub>3</sub>-plants, C<sub>4</sub>-plants and fossil are 3, 4 and 2, respectively.

346 Savannas are the main biome for C<sub>4</sub>-plants in SSA. For East African savannas,  $\delta^{13}\text{C}$  data suggests  
347 that  $\sim 62\%$  ( $f_{\text{C}_4, \text{NPP}}$ ) of the net primary production (NPP) is from C<sub>4</sub>-plants (the rest mainly C<sub>3</sub>-  
348 plants, Lloyd et al., 2008). Thus, one may assume that the source characteristics of TC emitted



349 from savanna burning should represent this plant-signature distribution. However, the aerosol  
350 emissions modulate the NPP activity by differences in emissions factors (EF). The uncertainties  
351 of EFs from different biomass burning activities are generally large and overlapping (Andreae,  
352 2019). As a first approximation, we here use  $f_{C_4,NPP}$  to estimate the fractional contribution of  
353 savanna emissions to TC ( $f_{savanna}$ ) as ( $i$  = sample index):

$$354 \quad f_{savanna}(i) = \frac{f_{C_4}(i)}{f_{C_4,NPP}} \quad (3)$$

355 This analysis shows that the dry season carbonaceous aerosol regime is dominated by savanna fire  
356 emissions (Fig. 6), reaching up to 71%. These results agree with the elevated levels of EC,  $K^+$  and  
357  $NO_3^-$  during JJA.

358

## 359 5. Outlook

360 In this paper we find that that the aerosol regime of the emissions affecting the Rwanda Climate  
361 Observatory (RCO) may be described as a two-state source mixture: a regional/local background  
362 signal modulated by savanna fire emissions. Multiple studies have shown that savanna fires  
363 strongly influence the aerosol regime in SSA. Here, we quantify the savanna fire contributions for  
364 carbonaceous aerosols to range from 50% (wet period;  $TC_{savanna} = 0.63 \mu g m^{-3}$ ) to 71% (dry period;  
365  $TC_{savanna} = 9.7 \mu g m^{-3}$ ) at a mountain background site in central SSA. The savanna fires are believed  
366 to be mainly lit by humans, and although these activities have been ongoing perhaps throughout  
367 the Holocene, these anthropogenic activities strongly perturb, e.g., the regional ecosystems,  
368 climate and air quality (e.g., Bird and Cali, 1998; Archibald et al., 1998). The annual SSA savanna  
369 carbon budget is a slight net  $CO_2$  source to the atmosphere (Still et al., 2003; Williams, 2007; Cais  
370 et al., 2011; Valentini et al., 2014; Palmer et al., 2019). Finding more sustainable alternatives to  
371 the slash-and-burn practices in SSA may turn the region into a carbon sink. For instance,  
372 implementation of early dry season burning may be a possible strategy (Lipset-Moore et al., 2018).  
373 Savanna fire mitigation would also improve the regional air quality and stabilize precipitation  
374 patterns, but could also accelerate climate change by reducing cloud brightening (Hodnebrog et  
375 al., 2015; Lu et al., 2018; Heft-Neal et al., 2018; Bauer et al., 2019; Haslett et al., 2019).



376 Nevertheless, our current level of scientific understanding of the impact of savanna burning on the  
377 environmental system is poor, as are the couplings/responses to climate change, population  
378 growth, urbanization and other key socio-economic and environmental challenges for sustainable  
379 development in SSA (e.g., IPCC, 2014; Lioussé et al., 2015; Brandt et al., 2017; UNDP, 2018).  
380 Savanna burning mitigation, or ~~induced shifts due to, e.g.,~~ climate change, may change the present  
381 steady-state in unpredictable ways (e.g., Abreu et al., 2017). To better constrain the multiple  
382 environmental impacts of savanna burning in SSA, the comparably few ongoing ground-based in  
383 situ observations should be expanded and solidified (Williams, 2007; Cais et al., 2011; Kulmala,  
384 2018; López-Ballesteros et al., 2018). For instance, observations of source-segregated aerosol  
385 concentrations provides multiple opportunities for advancing our knowledge ~~base on~~ SSA,  
386 including means for testing chemical-transport models; quantifying the relative importance of  
387 different atmospheric processes/emissions; assessing air quality effects; examining the relative  
388 importance of cooling vs warming (e.g., BC) aerosols; ground-truthing remote sensing products  
389 and detailed monitoring of the expected rapid change over the coming decades, including the  
390 effects of climate warming, population growth and urbanization.

391

392 *Data availability:* The chemical and isotopic data, as well as the MCMC-derived relative source  
393 contributions of C<sub>3</sub>-plants, C<sub>4</sub>-plants and fossil, and the corresponding source-segregated TC  
394 concentrations is provided in the supplementary information.

395

396 *Competing interests:* The authors declare that they have no conflict of interest.

397

398 *Author contributions:* AA wrote the manuscript, set-up the PM<sub>2.5</sub> high-volume sampler at RCO,  
399 and analyzed the data. ENK and SD conducted the carbonaceous aerosol quantifications and  
400 isolations for isotopes, and IC analysis. JG worked with the instruments, including helping or  
401 leading installation, and provided feedback on data analysis. KEP was instrumental in setting up  
402 the RCO and did most of the initial instrument installation. HLD served as the RCO station chief  
403 scientist for three years. JN and JdDN worked as technical coordinators of the project at different  
404 times and facilitated the operations of the station as well as providing feedback on analysis. BS

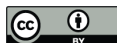

405 was our University of Rwanda liaison as the head of the Master's program in atmospheric and  
406 climate science. RGP is the head of the AGAGE network and is the MIT liaison to the RCO, and  
407 was essential in the setup of the observatory and scientific analysis. All authors commented on the  
408 manuscript.

409

410 *Acknowledgements.* We thank the generous MIT alumni donors to the MIT-Rwanda Climate  
411 Observatory Project that provided the funds to purchase, develop, and install most of the  
412 instruments at the Rwanda Climate Observatory. Additional funds for this purpose were provided  
413 by the MIT Center for Global Change Science. COMESA provided the funds to purchase and  
414 install the Aethalometer at the RCO. We also thank the Government of Rwanda and the Rwanda  
415 Ministry of Education, specifically Mike Hughes, Vianney Rugamba, and Marie Christine  
416 Gasingirwa, for supporting this project, including funding the staffing and infrastructure costs of  
417 the Rwanda Climate Observatory, and the University of Rwanda for providing laboratory space  
418 and infrastructure for instrument testing. We also wish to acknowledge the essential contributions  
419 of the Mugogo station technical experts Theobard Habineza, Modeste Mugabo, Olivier Shyaka,  
420 and Gaston Munyampundu and RBA technician Yves Fidele, without which running this station  
421 would be impossible. AA acknowledges project grants from the Swedish Research council  
422 (projects 348-2013-114 and 2017-05687). ENK acknowledges the People Programme (Marie  
423 Curie Actions) of the European Union's Seventh Framework Programme (FP7/2007-2013) under  
424 REA grant agreement 623386. We acknowledge the use of data and imagery from LANCE FIRMS  
425 operated by NASA's Earth Science Data and Information System (ESDIS) with funding provided  
426 by NASA Headquarters. The authors gratefully acknowledge the NOAA Air Resources  
427 Laboratory (ARL) for the provision of the HYSPLIT transport and dispersion model and/or  
428 READY website (<http://www.ready.noaa.gov>) used in this publication.





429 **References**

- 430 Abreu, R.C., Hoffmann, W.A., Vasconcelos, H.L., Pilo, N.A., Rossatto, D.R., Durigan, G.: The  
431 biodiversity cost of carbon sequestration in tropical savanna. *Sci. Advan.* 3, doi:  
432 10.1126/sciadv.1701284, 2017.
- 433 Aguilera, J., Whigham, L.D.: Using the  $^{13}\text{C}/^{12}\text{C}$  carbon isotope ratio to characterize the emission  
434 sources of airborne particulate matter: a review of literature. *Isotopes Environ. Health. Stud* 54,  
435 573-587, doi: 10.1080/10256016.2018.1531854, 2018.
- 436 Andersson, A.: A systematic examination of a random sampling strategy for source apportionment  
437 calculations. *Sci. Tot. Environ.* 412-413, 232-238, doi: 10.1016/j.scitotenv.2011.031, 2011.
- 438 Andersson, A., Deng, J., Du, K., Zheng, M., Yan, C., Sköld, M., Gustafsson, Ö.: Regionally-  
439 varying combustion sources of the January 2013 severe haze events over Eastern China. *Environ.*  
440 *Sci. Technol.* 49, 2038-2043, doi: 10.1021/es503855e, 2015.
- 441 Andreae, M.O.: Emission of trace gases and aerosols from biomass burning – An updated  
442 assessment. *Atmos. Chem. Phys. Discuss.* doi: 10.5194/acp-2019-303, 2019.
- 443 Archibald, S., Staver, A.C., Levin, S.A.: Evolution of human-driven fire regimes in Africa. *Proc.*  
444 *Nat. Acad. Sci.* 109, 847-852, doi: 10.1073/pnas.1118648109, 2012.
- 445 Aurela, M., Beukes, J.P., van Zyl, P., Vakkari, V., Teinilä, K., Saarikoski, S., Laakso, L.: The  
446 composition of ambient and fresh biomass: burning aerosols at a savannah site, South Africa.  
447 *South Afr. J. Sci.* 112, 1-8, doi: 10.17159/sajs.2016/20150223, 2016.
- 448 Barrière, J., Oth, A., Theys, N., d'Oreye, N., Kervyn, F.: Long-term monitoring of long-period  
449 seismicity and space-based  $\text{SO}_2$  observation at African lava lake volcanoes Nyiarango and  
450 Nyamulagira (DR Congo). *Grophys. Res. Let.* 44, 6020-6029, doi: 10.1002/2017GL073348, 2017.
- 451 Bauer, S.E., Im, U., Mezuman, K., Gao, C.Y.: Desert dust, industrialization, and agricultural fires:  
452 health impacts of outdoor air pollution in Africa. *J. Geophys. Res.* 124, 4104-4120, doi:  
453 10.1029/2018JD029336, 2019.



- 454 Bender, M.M.: Variations in the  $^{13}\text{C}/^{12}\text{C}$  ratios of plants in relation to the pathway of  
455 photosynthetic carbon dioxide fixation. *Phytochem.* 10, 1239-1244, doi: 10.1016.S0031-  
456 9422(00)84324-1, 1971.
- 457 Bikkina, S., Andersson, A., Sarin, M.M., Sheesley, R.J., Kirillova, E., Rengarajan, R., Sudheer,  
458 A.K., Ram, K., Gustafsson, Ö.: Dual isotope characterization of total organic carbon in wintertime  
459 carbonaceous aerosols for northern India. *J. Geophys. Res.* 121, doi: 10.1002/2016JD024880,  
460 2016.
- 461 Billmark, K.A., Swap, R.A., Macko, S.A.: Stable isotope and GC/MS characterization African  
462 aerosols. *South African J. Sci.* 101, 177-170, 2005.
- 463 Birch, M.E., Cary, R.A.: Elemental carbon-based method for monitoring occupational exposures  
464 to particulate diesel exhaust. *Aerosol Sci. Technol* 25, doi: 10.1080/02786829608965393, 1996.
- 465 Bird, M.I., Cali, J.A.: A million-year record of fire in sub-Saharan Africa. *Nature* 394, 767-769,  
466 doi: 10.1038/29507, 1998.
- 467 Blanchard, D.C., Woodcock, A. H.: The production, concentration, and vertical distribution of the  
468 sea-salt aerosol. *Annal. N.Y. Acad. Sci.* doi: 10.1111/j.1749-6632.1980.tb17130.x, 1980.
- 469 Bond, T.C., Doherty, S.J., Fahey, D.W., Forster, P.M., Berntsen, T., DeAngelo, B.J., Flanner,  
470 M.G., Ghan, S., Kärcher, B., Koch, D., Kinne, S., Kondo, Y., Quinn, P.K., Sarofim, M.C., Schultz,  
471 M.G., Schultz, M., Venkataram, C., Zhang, H., Zhang, S., Bellouin, N., Guttikunda, S.K., Hopke,  
472 P.K., Jacobson, M.Z., Kaiser, J.W., Klimont, Z., Lohmann, U., Schwarz, J.P., Shindell, D.,  
473 Storelvmo, T., Warren, S.G., Zender, C.S.: Bounding the role of black carbon in the climate  
474 system: A systematic assessment. *J. Geophys. Res.* 118, 5380-5552, doi: 10.1002/jgrd.50171,  
475 2013.
- 476 Brandt, M., Rasmussen, K., Penuelas, Tian, F., J., Schurgers, G., Verger, A., Mertz, O., Palerm,  
477 J.R.B., Fensholt, R.: Human population growth offsets climate-driven increase in woody  
478 vegetation in sub-Saharan Africa. *Nature Ecol. Evol.* 1, doi: 10.1038/s41559-017-0081, 2017.
- 479 Brito, J., Freney, E., Dominutti, P., Borbon, A., Haslett, S.L., Batenburg, A.M., Colomb, A.,  
480 Dupuy, R., Denjean, C., Burnet, F., Bourriane, T., Deroubaix, A., Sellegri, K., Borrmann, S. Coe,



- 481 H., Flamant, C., Knippertz, P., Schwarzenboeck, A.: Assessing the role of anthropogenic and  
482 biogenic source on PM<sub>1</sub> over southern West Africa using aircraft measurements. *Atmos. Chem.*  
483 *Phys.* 18, 757-772, doi: 10.5194/acp-18-757-2018, 2018.
- 484 Cachier, H., Buat-Menard, P., Fontuge, M., Rahnecr, J.: Source terms and source strengths of the  
485 carbonaceous aerosol in the tropics. *J. Atmos. Chem.* 3, 469-489, doi: 10.1007/BF00053872, 1985.
- 486 Cahoon, D.R., Stocks, B.J., Levine, J.S., Cofer III, W.R., O'Neil, K.P.: Seasonal distribution of  
487 African savanna fires. *Nature*, 359, 812-815, doi: 10.1038/359812a0, 1992.
- 488 Cais, P., Bombelli, A., Williams, M., Piao, S.L., Chave, J., Ryan, C.M., Henry, M., Brender, P.,  
489 Valentini, R.: The carbon balance of Africa: synthesis of recent research studies. *Phil. Trans. Roy.*  
490 *Soc. A* 369, 2038-2057, doi: 10.1098/rsta.2010.0328, 2011.
- 491 Das, O., Wang, Y., Hsieh, Y.-P.: Chemical and carbon isotopic characteristics of ash and smoke  
492 derived from burning of C<sub>3</sub> and C<sub>4</sub> grasses. *Org. Geochem.* 41, 263-269,  
493 doi: 10.1016/j.orggeochem.2009.11.001, 2010.
- 494 Dasari, S., Andersson, A., Bikkina, S., Holmstrand, H., Budhavant, K., Sateesh, S., Asmi, E.,  
495 Kesti, J., Backman, J., Salam, A., Singh Bisht, D., Tiwari, S., Hameed, S., Gustafsson, Ö.:  
496 Photochemical degradation affects the light absorption of water-soluble brown carbon in the South  
497 Asian outflow. *Sci. Adv.* 5, doi: 10.1126/sciadv.aau8066, 2019.
- 498 DeWitt, H.L., Gasore, J., Rupakheti, M., Potter, K.E., Prinn, R.G., Ndikubwimana, JdD., Nkusi,  
499 J., Safari, B.: Seasonal and diurnal variability in O<sub>3</sub>, black carbon, and CO measured at the Rwanda  
500 Climate Observatory. *Atmos. Chem. Phys.* 19, 2063-2078, doi: 10.5194/acp-19-2063-201, 2019.
- 501 Fang, W., Andersson, A., Zheng, M., Lee, M., Holmstrand, H., Kim, S-W., Du, K., Gustafsson,  
502 Ö.: Divergent evolution of carbonaceous aerosols during dispersal of East Asian haze. *Sc. Rep.* 7,  
503 doi: 10.1038/s41598-017-10766-4, 2017.
- 504 Formenti, P., Elbert, W., Maenhaut, W., Haywood, J., Osborne, S., Andreae, M.O.: Inorganic and  
505 carbonaceous aerosols during the Southern African Regional Science Initiative (SAFARI 2000)



- 506 experiment: Chemical characteristics, physical properties, and emission data for smoke from  
507 African biomass burning. *J. Geophys. Res.* 108. Doie: 10.1029/2002JD002408, 2003.
- 508 Gao, S., Hegg, D.A., Hobbs, P.V., Kirchstetter, T.W., Magi, B.I., Sadilek, M.: Water-soluble  
509 organic components in aerosols associated with savanna fires in southern Africa: Identification,  
510 evolution and distribution. *J. Geophys. Res.* 108, doi: 10.1029/2002JD002324, 2003.
- 511 Gatari, M.J., Boman, J.: Black carbon and total carbon measurements at urban and rural sites in  
512 Kenya, East Africa. *Atmos. Environ.* 8, 1149-1154, doi: 10.1016/S1352-2310(02)01001-4, 2003.
- 513 Graven, H.: Impact of fossil fuel emissions on atmospheric radiocarbon and various applications  
514 of radiocarbon over this century. *Proc. Nat. Acad. Sci.* 112, 9542-9545, doi:  
515 10.1073/pnas.1504467112, 2015.
- 516 Gustafsson, Ö., Kruså, M., Zencak, Z., Sheesley, R.J., Granat, L., Engström, E., Praveen, P.S.,  
517 Rao, P.S.P., Leck, C., Rodhe, H.: Brown clouds over South Asia: Biomass or fossil fuel  
518 combustion? *Science* 323, 495-498, doi: 10.1126/science.1164857, 2009.
- 519 Haslett, S.L., Taylor, J.W., Evans, M., Morris, E., Vogel, B., Dajuma, A., Brito, J., Batenburg,  
520 A.M., Borrmann, S., Schneider, J., Schulz, C., Denjean, C., Bourriane, T., Knippertz, P., Dupuy,  
521 R., Schwarzenböck, A., Sauer, D., Flamant, C., Dorsey, J., Crawford, J., Coe, H.: Remote biomass  
522 burning dominates southern West African air pollution during the monsoon, *Atmos. Chem. Phys.*  
523 *Discuss.* doi: 10.5194/acp-2019-38, 2019.
- 524 Heft-Neal, S., Burney, J., Bendavid, E., Burke, M.: Robust relationship between air quality and  
525 infant mortality in Africa. *Nature* 559, 254-258, doi: 10.1038/s41586-018-0263-3, 2018.
- 526 Hodnebrog, Ø., Myhre, G., Forster, P.M., Sillman, J., Samset, B.H.: Local biomass burning is a  
527 dominant cause of the observed precipitation reduction in southern Africa. *Nature Com.* 7, doi:  
528 10.1038/ncomms11236, 2015.
- 529 IPCC – Inter-Governmental Panel for Climate Change: AR5 Climate Change 2013: The physical  
530 science basis. ISBN 978-1107661820, 2013.
- 531 IPCC – Inter-Governmental Panel for Climate Change: AR5 Climate Change 2014: Impacts,  
532 adaptation and vulnerability. ISBN 978-1-107-68386-0, 2014.



- 533 Keeling, C.D.: The concentration and isotopic abundances of atmospheric carbon dioxide in rural  
534 areas. *Geochem. Cosmochim. Acta.* 13, 322-334, doi: 10.1016/0016-7037(58)90033-4, 1958.
- 535 Kirchstetter, T.W., Novakov, T., Hobbes, P.V., Magi, B.: Airborne measurements of carbonaceous  
536 aerosols in southern Africa during the dry biomass season. *J. Geophys. Res.* 108. Doi:  
537 10.1029/2002JD002171, 2003.
- 538 Kirillova, E.N., Andersson, A., Sheesley, R.J., Kruså, M., Praveen, P.S., Budhavant, K., Safai,  
539 P.D., Rao, P.S.P., Gustafsson Ö:  $^{13}\text{C}$  and  $^{14}\text{C}$ -based study of sources and atmospheric processing  
540 of water-soluble organic carbon (WSOC) in South Asian aerosols. *J. Geophys. Res.* 118, 621-626,  
541 doi: 10.1002/jgrd.50130, 2013.
- 542 Kirillova, E.N., Andersson, A., Han, J., Lee, M., Gustafsson, Ö.: Sources and light absorption of  
543 water-soluble organic carbon aerosols in the outflow from northern China. *Atmos. Chem. Phys.*  
544 14, 1413-1422, doi: 10.5194/acp-14-1413-2014, 2014.
- 545 Kulmala, M.: Build a global Earth Observatory. *Nature* 553, 21-23, 2018.
- 546 Liousse, C., Assamoi, E., Criqui, C., Rosset, R.: Explosive growth in African combustion  
547 emissions from 2005 to 2030. *Environ. Res. Lett.* 9, doi: 10.1088/1748-9326/9/3/035003, 2014.
- 548 Lipset-Moore, G.J., Wolff, N., Game, E.T.: Emissions mitigation opportunities for savanna  
549 countries from early dry season fire management. *Nature Com.* 9, doi: 10.1038/s41467-018-  
550 04687-7, 2018.
- 551 Lloyd, J., Bird, M.I., Vellen, L., Miranda, A.C., Veenendaal, E.M., Djangbletey, G., Miranda, H.S.,  
552 Cook, G., Faruqhar, G.D.: Contributions of woody and herbaceous vegetation to tropical savanna  
553 ecosystem productivity: a quasi-global estimate. *Tree Phys.* 28, 451-468, doi:  
554 10.1093/treephys/28.3.45, 2008.
- 555 López-Ballesteros, A., Beck, J., Bombelli, A., Grieco, E., Lorenkova, E.K., Merbold, L.,  
556 Brümmer, C., Hugo, W., Scholes, R., Vackar, D., Vermeulen, A., Acosta, M., Butterbach-Bahl,  
557 K., Helmschrot, J., Kim, D.-G., Jones, M., Jorch, V., Pavleka, M., Skjelvan, I., Saunders, M.:  
558 Towards a feasible and representative pan-African research infrastructure network for GHG  
559 observations. *Environ. Res. Lett.* 13, doi: 10.1088/1748-9326/aad66c, 2018.



- 560 Lu, Z., Liu, X., Zhao, C., Meyer, K., Rajapakshe, C., Wu, C., Yang, Z., Penner, J.E.: Biomass  
561 smoke from southern Africa can significantly enhance the brightness of stratocumulus over the  
562 southeastern Atlantic Ocean. *Proc. Nat. Acad. Sci*, 115, 2924-2929, doi:  
563 10.1073/pnas.1713703115, 2018.
- 564 Maenhaut, W., Salma, I., Cafmeyer, J., Annegarn, H.J., Andreae, M.O.: Regional atmospheric  
565 aerosols composition and sources in the eastern Transvaal, South Africa, and impact of biomass  
566 burning. *J. Geophys. Res.* 101, 23631-23650, 1996.
- 567 Martinelli, L.A., Camargo, P.B., Lara, L.B.L.S., Victoria, R.L., Artaxo, P.: Stable carbon and  
568 nitrogen isotopic composition of bulk aerosol particles in a C4 plant landscape of southeast Brazil.  
569 *Atmos. Environ.* 36, 2427-2432, doi: 10.1016/S1352-2310(01)00454-X, 2002.
- 570 Marwick, T.R., Tamooh, F., Teofuru, C.R., Borget, A.V., Darchambeau, F., Bouillon, S.: The age  
571 of river-transported carbon: global perspective. *Glob. Biogeochem. Cyc.* 29, 122-137, doi:  
572 10.1002/2014GB004911, 2015.
- 573 Mkoma, S.L., Kawamura, K., Tachibana, E., Fu, P.: Stable carbon and nitrogen isotopic  
574 compositions of tropical atmospheric aerosols: sources and contribution from burning of C<sub>3</sub> and  
575 C<sub>4</sub> plants to organic aerosols. *Tellus B*, 66, 1-12, doi: 10.3402/tellusb.v66.20176, 2014.”
- 576 O’Leary, M.H.: Carbon isotopes in photosynthesis. *Bioscience* 38, 328–36, doi: 10.2307/1310735,  
577 1988.
- 578 Palmer, P.I., Feng, L., Chevallier, F., Bösch, H., Somkuti, P.: Net carbon emissions from African  
579 biosphere dominate pan-tropical atmospheric CO<sub>2</sub> signal. *Nature Com.* 10. doi: 10.1038/s41467-  
580 019-11097-w, 2019.
- 581 Puxbaum, H., Rendl, J., Allabashi, R., Otter, L., Scholes, M.C.: Mass balance of the atmospheric  
582 aerosol in a South African savanna (Nylsvley, May 1997). *J. Geophys. Res.* 105, 20697-20706,  
583 2000.
- 584 Sheesley, R.J., Kirillova, E.N., Andersson, A., Kruså, M., Praveen, P.S., Budhavant, K., Safai, P.D.,  
585 Rao, P.S.P., Gustafsson, Ö.: Year-round radiocarbon-based source apportionment of carbonaceous



- 586 aerosols at two background sites in South Asia. *J. Geophys. Res.* 117, doi:  
587 10.1029/2011JD017161, 2012.
- 588 Sinha, P., Hobbs, P.V., Yokelson, R.J., Bertschi, I.T., Blake, D.R., Simpson, I.J., Gao, S.,  
589 Kirchstetter, T.W., Novakov, T.: Emissions of trace gases and particles from savanna fires in  
590 southern Africa. *J. Geophys. Res.* 108, doi: 10.1029/2002JD002325, 2003.
- 591 Still, C.J., Berry, J.A., Collatz, G.J., DeFries, R.S.: Global distribution of C<sub>3</sub> and C<sub>4</sub> vegetation:  
592 Carbon cycle implications. *Glob. Biogeochem. Cyc.* 17, doi: 10.1029/2000GB001807, 2003.
- 593 Swap, R.J., Annegard, H.J., Suttles, J.T., King, M.D., Platnick, S., Privette, J.L., Scholes, R.J.:  
594 Africa burning: A thematic analysis of the Southern African regional science initiative (SAFARI  
595 2000). *J. Geophys. Res.* 108, doi: 10.1029/2003JD003747, 2003.
- 596 Tiitta, P., Vakkari, V., Croteau, P., Beukes, J.P., van Zyl, P.G., Josipovic, M., Venter, A.D., Jaaros,  
597 K., Pienaar, J.J., Ng, N.L., Canagaratna, M.R., Jayne, J.T., Kerminen, V.-K., Kokola, H., Kulmala,  
598 M., Laaksonen, A., Worsnop, D.R., Laakso, L.: Chemical composition, main sources and temporal  
599 variability of PM<sub>1</sub> aerosols in southern African grassland. *Atmos. Chem. Phys.* 14, 1909-1927,  
600 doi: 10.5194/acp-14-1909-2014, 2014.
- 601 Turekian, V. C., Macko, S., Swap, R. J. and Garstang, M.: Causes of bulk carbon and nitrogen  
602 isotopic fractionations in the products of vegetation burns: laboratory studies. *Chem. Geol.* 152,  
603 181-192, 10.1016/S0009-2541(98)00105-3, 1998.
- 604 Turnbull, J.C., Mikaloff Fletcher, S.E., Ansell, I., Brailsford, G.W., Moss, R.C., Norris, M.W.,  
605 Steinkamp, K.: Sixty years of radiocarbon dioxide measurements at Wellington, New Zealand:  
606 1965-2014. *Atmos. Chem. Phys.* 17, 14771-14784, doi: 10.5194/acp-17-14771-2017, 2017.
- 607 UNDP – United Nations Development Programme: 2018 Africa Sustainable Development Report:  
608 Towards a transformed and resilient continent. ISBN: 978-92-1-125134-0, 2018.
- 609 UNEP/WMO – United Nations Environment Programme/World Meteorological Organization:  
610 Integrated assessment of black carbon and tropospheric ozone. ISBN: 978-92-807-3142-2, 2012.



- 611 Valentini, R., Arneth, A., Bombelli, A., Castaldi, S., Cazzolla Gatti, R., Chevallier, F., Cias, P.,  
612 Grieco, E., Hartmann, J., Henry, M., Houghton, R.A., Jung, M., Kutsch, W.L., Malhi, Y.,  
613 Mayorga, E., Merbold, L., Murray-Tortarolo, G., Papale, D., Peylin, P., Poulter, B., Raymond,  
614 P.A., Santini, M., Sitch, S., Vaglio Laurin, G., van der Werf, G.R., Williams, C.A., Scholes, R.J.:  
615 A full greenhouse gases budget of Africa: synthesis, uncertainties, and vulnerabilities.  
616 *Biogeosciences* 11, 381-407, doi: 10.5194/bg-11-381-2014, 2014.
- 617 WHO – World Health Organization: Health effects of black carbon. ISBN: 978 92 890 0265 3,  
618 2012.
- 619 WHO – World Health Organization: Ambient air pollution: A global assessment of exposure and  
620 burden of disease. ISBN: 9789241511353, 2016.
- 621 Widory, D.: Combustibles, fuels and their combustion products: A view through carbon isotopes.  
622 *Combust. Theory Mod.* 10, 831-841, doi: 10.1080/13647830600720264, 2006.
- 623 Wild, B., Andersson, A., Bröder, L., Vonk, J., Hugelius, G., McClelland, J.W., Song, W.,  
624 Raymond, P.A., Gustafsson, Ö.: Rivers across the Siberian Arctic unearth the patterns of carbon  
625 release from thawing permafrost. *Proc. Nat. Acad.* 116, 10280-10285, doi:  
626 10.1073/pnas.181179116, 2019.
- 627 Williams, C.A., Hanan, N.P., Neff, J.C., Scholes, R.J., Berry, J.A., Denning, S.A., Baker, D.F.:  
628 Africa and the global carbon cycle. *Carbon Bal. Manag.* 2, 1-13, doi: 10.1186/1750-0680-2-3,  
629 2007.
- 630 Winiger, P., Barrett, T.E., Sheesley, R.J., Huang, L., Sharma, S., Barrie, L.A., Yttri, K.E.,  
631 Evangeliou, N., Eckhardt, S., Stohl, A., Klimont, Z., Heyes, C., Semiletov, I.P., Dudarev, O.V.,  
632 Charkin, A., Shakhova, N., Holmstrand, H., Andersson, A., Gustafsson, Ö.: Source apportionment  
633 of circum-Arctic atmospheric black carbon from isotopes and modelling. *Sci. Adv.* 5, doi:  
634 10.1126/sciadv.aau8052, 2019.





635 Yan, C., Zheng, M., Bosch, C., Andersson, A., Desyaterik, Y., Sullivan, A.P., Collett, J.L., Zhao,  
636 B., Wang, S., He, K., Gustafsson, Ö.: Important fossil source contribution to brown carbon in  
637 Beijing during Winter. *Sci. Rep.* 7, doi: 10.1038/srep43182, 2017.



638 **TABLES**

639 **Table 1.** Concentrations ( $\mu\text{g m}^{-3}$ ;  $\mu\text{gC m}^{-3}$  for carbonaceous components) of fine aerosol  
 640 components from ground-based and airborne measurements over Sub-Saharan Africa (bkg =  
 641 background).

| Sampling site                                 | TC       | OC      | BC/EC       | WSOC    | $\text{NO}_3^-$ | $\text{SO}_4^{2-}$ | $\text{NH}_4^+$ | $\text{K}^+$ |
|-----------------------------------------------|----------|---------|-------------|---------|-----------------|--------------------|-----------------|--------------|
| RCO, dry <sup>a</sup>                         | 9.5±3.7  | 8.2±3.2 | 1.3±0.6     | 5.7±2.1 | 1.2±0.7         | 2.1±1.0            | 0.8±0.3         | 0.7±0.3      |
| RCO, wet <sup>a</sup>                         | 2.4±1.2  | 2.2±1.1 | 0.20±0.1    | 1.5±0.7 | 0.1±0.1         | 0.7±0.3            | 0.3±0.1         | 0.08±0.05    |
| Rural Tanzania, dry <sup>b</sup>              | 7±2      | 6±2     | 1.0±0.3     | 4±1     | 0.18±0.06       | 0.2±0.1            | 0.9±0.7         | 1.5±0.7      |
| Rural Tanzania, wet <sup>b</sup>              | 4±1      | 4±1     | 0.5±1.3     | 3±1     | 0.06±0.03       | 0.1±0.1            | 0.2±0.1         | 0.4±0.2      |
| Aircraft, Southern Africa, smoke <sup>c</sup> | N/A      | N/A     | N/A         | N/A     | 4.84±0.02       | 10.4±0.6           | N/A             | 13.1±0.1     |
| Aircraft, Southern Africa, bkg <sup>c</sup>   | N/A      | N/A     | N/A         | N/A     | 0.48±0.00       | 2.2±0.1            | N/A             | 0.31±0.02    |
| Aircraft, Southern Africa fresh <sup>d</sup>  | N/A      | 20±18   | 2±1         | N/A     | 1.4±1.8         | 1.9±1.4            | 1.6±2.4         | 4.5±8.1      |
| Aircraft, Southern Africa aged <sup>d</sup>   | N/A      | 6±3     | 1.03±0.04   | N/A     | 1.0±0.8         | 2.0±1.5            | 0.9±0.8         | 0.6±0.4      |
| Aircraft, Southern Africa, plume <sup>e</sup> | 106±86   | 91±74   | 15±12       | N/A     | N/A             | N/A                | N/A             | N/A          |
| Aircraft, Southern Africa haze <sup>e</sup>   | 10.5±8.2 | 9.5±6.8 | 2.3±1.8     | N/A     | N/A             | N/A                | N/A             | N/A          |
| Aircraft, Southern Africa <sup>f</sup>        | 8.5±4.8  | N/A     | 2.3±1.9     | N/A     | 0.8±0.3         | 4.5±3.6            | N/A             | 0.4±0.1      |
| National Park, South Africa <sup>g</sup>      | N/A      | N/A     | 1.2 - 2.2   | N/A     | N/A             | N/A                | N/A             | 0.22 - 0.34  |
| Savanna, South Africa <sup>h</sup>            | 9.1      | N/A     | 0.61        | N/A     | 0.4             | 11.08              | 2.85            | 0.28         |
| Aircraft, W. Africa, bkg <sup>i</sup>         | N/A      | N/A     | 0.33 - 0.35 | N/A     | 0.11 - 0.12     | 1.64 - 1.70        | 0.63 - 0.68     | N/A          |
| Aircraft, W. Africa, urban plume <sup>i</sup> | N/A      | N/A     | 0.64 - 0.72 | N/A     | 0.49 - 0.53     | 2.70 - 3.03        | 1.20 - 1.38     | N/A          |
| Grassland, South Africa, dry <sup>j</sup>     | N/A      | N/A     | 0.6         | N/A     | 0.3             | 1.4                | 0.2             | N/A          |
| Grassland, South Africa, wet <sup>j</sup>     | N/A      | N/A     | 0.3         | N/A     | 0.2             | 0.4                | 0.3             | N/A          |
| Savanna, South Africa, spring <sup>k</sup>    | N/A      | N/A     | 0.40        | N/A     | 0.05            | 2.48               | 0.05            | 0.17         |
| Savanna, South Africa, summer <sup>k</sup>    | N/A      | N/A     | 0.16        | N/A     | 0.01            | 5.65               | 0.01            | 0.2          |

- 642 a. Present study  
 643 b. Mkoma et al., 2014  
 644 c. Gao et al., 2003  
 645 d. Formenti et al., 2003  
 646 e. Kirchstetter et al, 2003  
 647 f. Sinha et al., 2003  
 648 g. Maenhaut et al., 1996  
 649 h. Puxbaum et al., 2000  
 650 i. Brito et al., 2018  
 651 j. Tiitta et al., 2014  
 652 k. Aurela et al., 2016



653 **FIGURES**

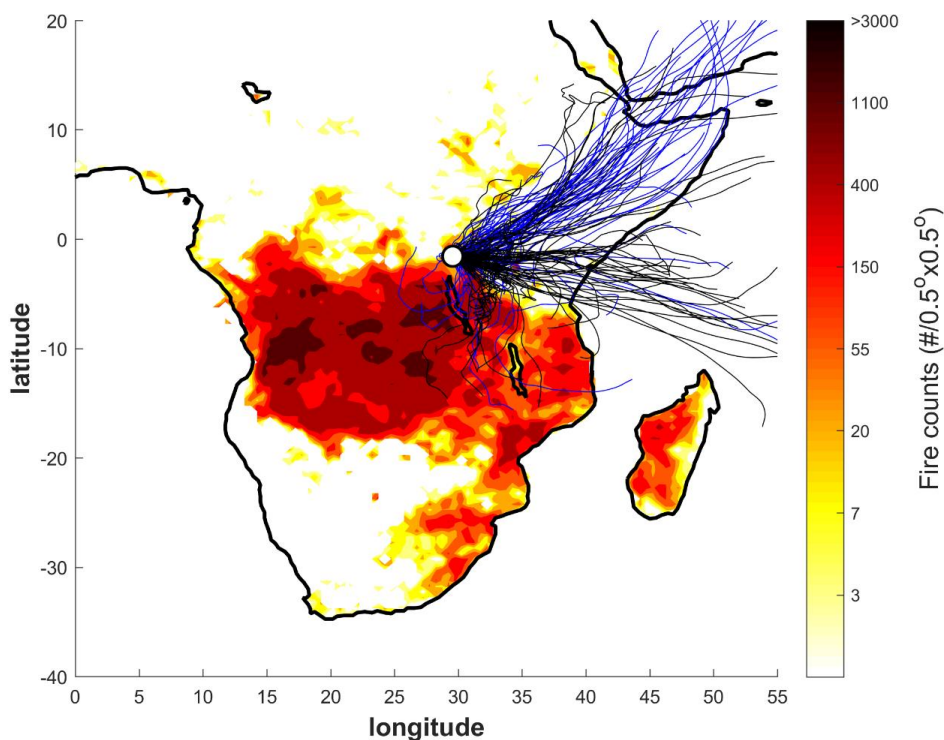

654

655

656 **Figure 1.** Fire counts and air mass back trajectories for the October 2014 to September 2015  
657 campaign at the Rwanda Climate Observatory (RCO, black and white circle). The fire counts are  
658 from the Fire Information for Resource Management System (FIRMS) derived from the NASA  
659 Moderate Resolution Imaging Spectroradiometer (MODIS) satellite product for June-July-August  
660 (JJA), 2015. The thin lines represent daily (3AM, C.A.T.) 7-day air mass back-trajectories arriving  
661 at RCO. The blue lines correspond to what we here refer to the ‘wet’ period (October-November  
662 2014 and April-May 2015), whereas the black lines represent the dry JJA period.

663

664

665



666 **Figure 2.** Concentrations of carbonaceous aerosols (TC = total carbon; EC = elemental carbon; OC = organic carbon; WSOC = water-soluble organic carbon) and inorganic ions in PM<sub>2.5</sub> during  
667 October 2014 to September 2015 at the Rwanda Climate Observatory. The November 2014 to  
668 April 2015 gap is due to a lightning strike. The concentrations of EC were multiplied by 5 and K<sup>+</sup>  
669 April 2015 gap is due to a lightning strike. The concentrations of EC were multiplied by 5 and K<sup>+</sup>  
670 by 2 for visual clarity.

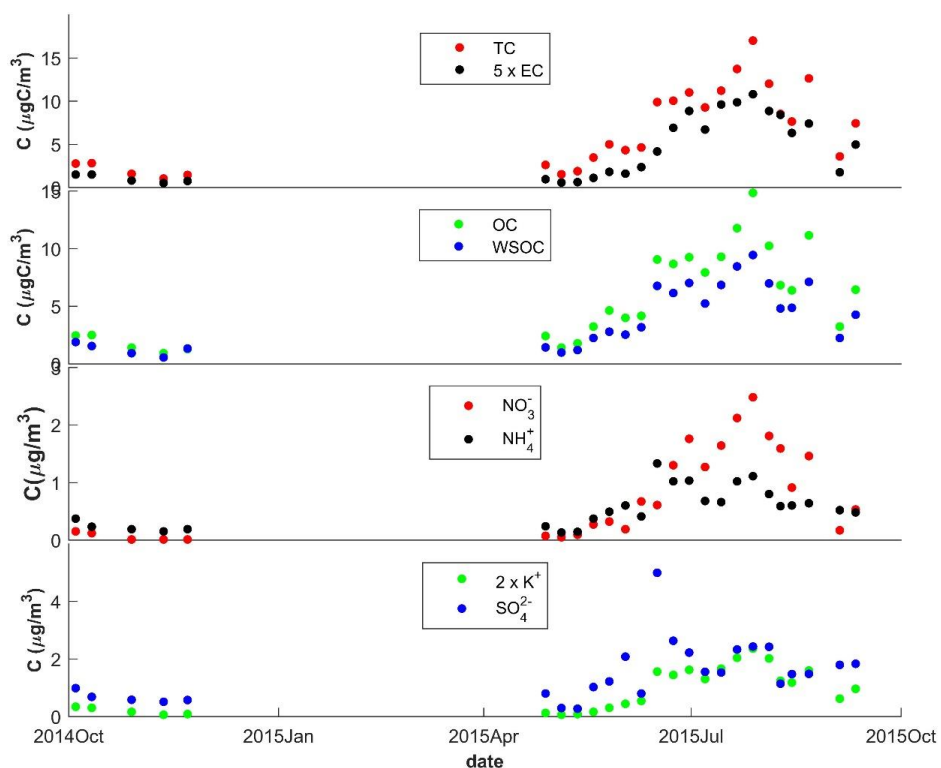

671



672 **Figure 3.** Ratios of carbonaceous aerosols (EC = elemental carbon; OC = organic carbon; WSOC  
673 = water-soluble organic carbon) and inorganic ions relative to total carbon (TC) in PM<sub>2.5</sub> during  
674 October 2014 to September 2015 at the Rwanda Climate Observatory. The November 2014 to  
675 April 2015 gap is due to a lightning strike. The concentrations of K<sup>+</sup>/TC and NH<sub>4</sub><sup>+</sup>/TC ratios were  
676 multiplied by 2 for visual clarity.

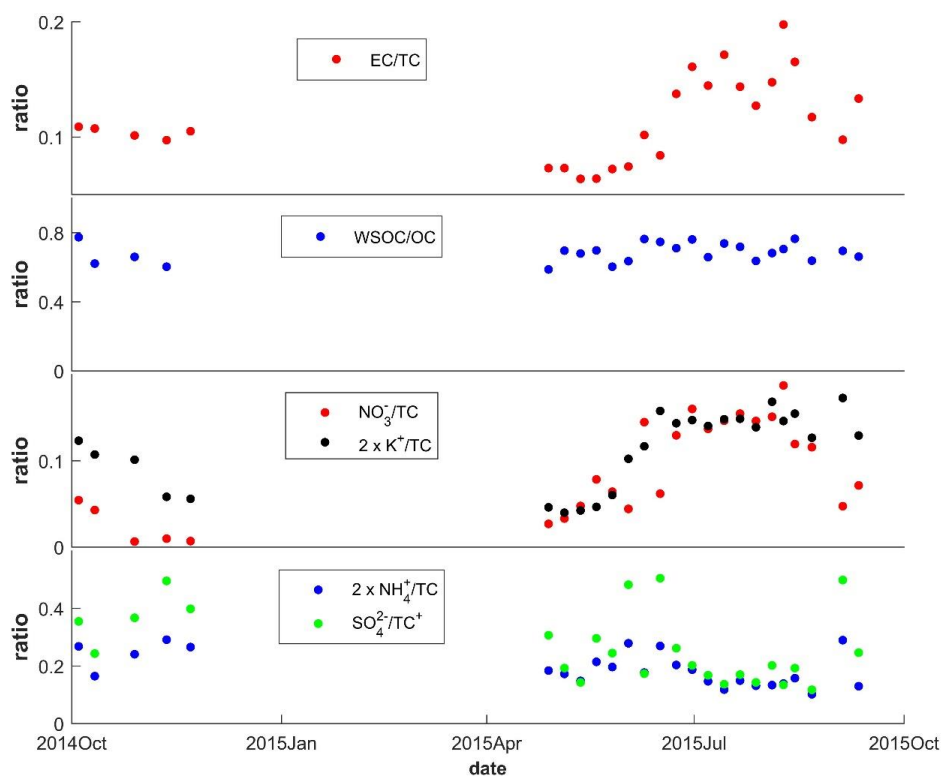

677



678 **Figure 4:** Dual carbon isotope data for TC. Panel A.  $\Delta^{14}\text{C}$  vs time. Panel B.  $\delta^{13}\text{C}$  vs time. Panel C.  
679  $\Delta^{14}\text{C}$  vs TC (blue circles). The black line is the fit of the equation  $\Delta^{14}\text{C} = A/[\text{TC}] + B$ , using Markov  
680 chain Monte Carlo simulations, where A and B are fitting parameters ( $A = -135 \pm 16 \text{ } \mu\text{g m}^{-3}$ ;  $B =$   
681  $37 \pm 6 \text{ } \text{‰}$ ). The grey shaded area is the  $1\sigma$  spread of the fit.

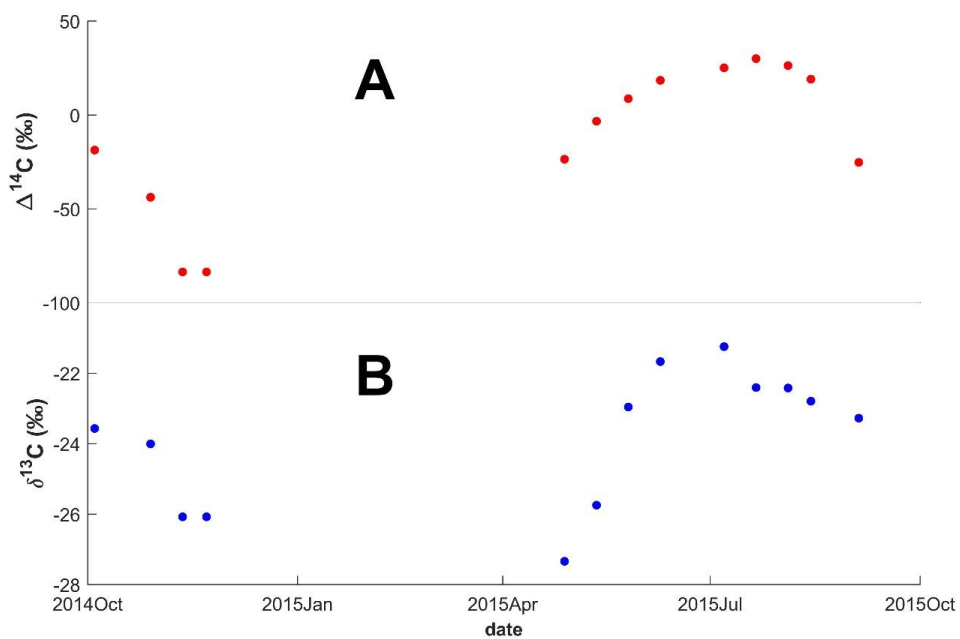

682

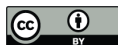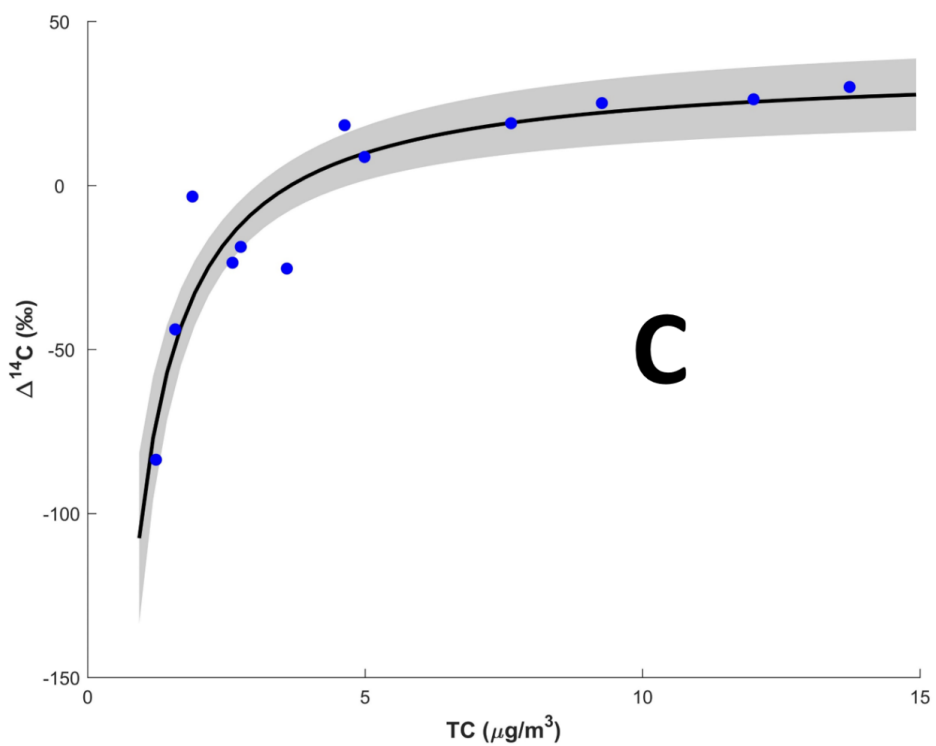

683



684 **Figure 5:** Dual carbon ( $\Delta^{14}\text{C}$  vs  $\delta^{13}\text{C}$ ) isotope plot of TC. Blue circles represent Oct-Nov 2014  
685 (wet), yellow circles Apr-May 2015 (wet), and red circles Jun-Sept 2015 (dry). The boxes  
686 represent the endmember ranges (mean  $\pm$  stdev; see Section 3.5) of the three main sources: C<sub>3</sub>-  
687 plants (green), C<sub>4</sub>-plants (orange), and fossil (black).

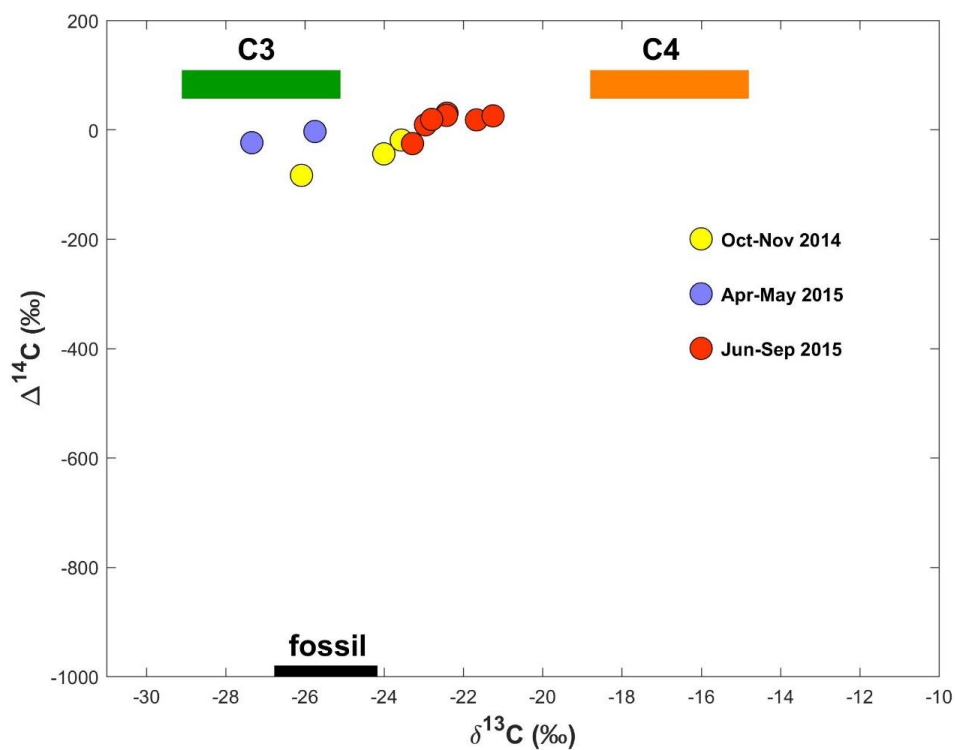

688

689

690

691





692 **Figure 6:** Carbon isotope-source segregated fractions and concentrations of TC vs time. Panel A.  
693 Relative source contributions (%) of C<sub>3</sub>-plants (green circles), C<sub>4</sub>-plants (orange diamonds) and  
694 fossil (black triangles). The error bars (standard deviations) were constrained using Markov chain  
695 Monte Carlo simulations. Panel B. Source segregated concentrations of TC of C<sub>3</sub>-plants (green  
696 circles), C<sub>4</sub>-plants (orange diamonds) and fossil (black triangles).

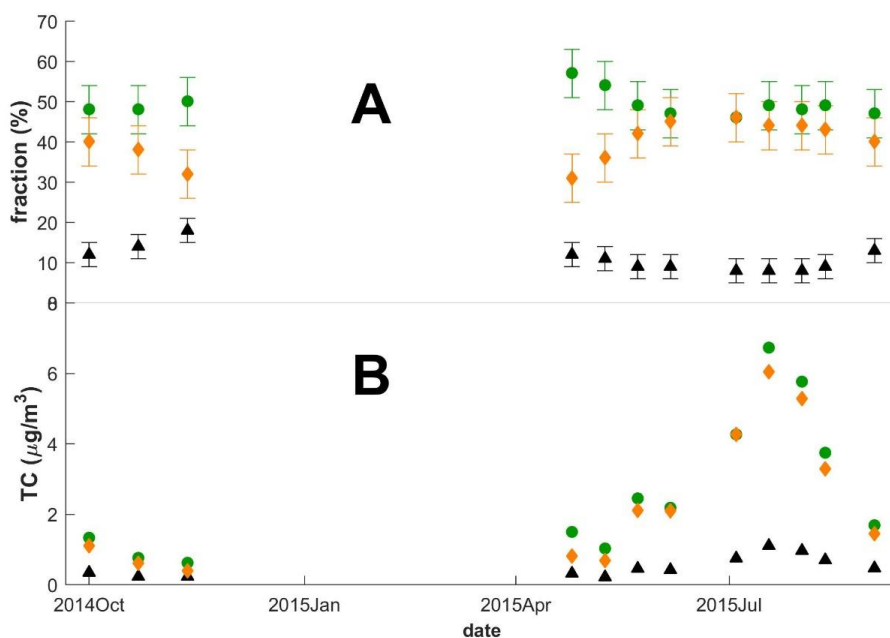

697
